# Supplementary material for: Experimental and theoretical studies on the corrosion inhibition performance of 4-amino-N,N-di-(2-pyridylmethyl)-aniline on mild steel in hydrochloric acid
Source: Royal Society of Chemistry journal article supplement (doi:10.1039/c5ra09173j), 2015-01-01

**Electronic Supplementary Information (ESI) for**  
**Experimental and theoretical studies on the corrosion inhibition**  
**performance of 4-amino-N, N-di-(2-pyridylmethyl)-aniline on**  
**mild steel in hydrochloric acid**

Bin Xu,<sup>a</sup> Yan Ji,<sup>a</sup> Xueqiong Zhang,<sup>a</sup> Xiaodong Jin,<sup>a</sup> Wenzhong Yang,<sup>a\*</sup> and Yizhong Chen<sup>b</sup>

<sup>a</sup> *Department of Applied Chemistry, School of Science, Nanjing Tech University, Nanjing 210009, China.*

<sup>b</sup> *School of Environmental and Safety Engineering, Jiangsu Polytechnic University, Changzhou 213164, China*

**Table of Contents**

Figure S1-S4.

<sup>1</sup>H, <sup>13</sup>C NMR, MS and FTIR spectra of 4-amino-N, N-di-(2-pyridylmethyl)-aniline.

Figure S1. <sup>1</sup>H NMR of 4-amino-N, N-di-(2-pyridylmethyl)-aniline

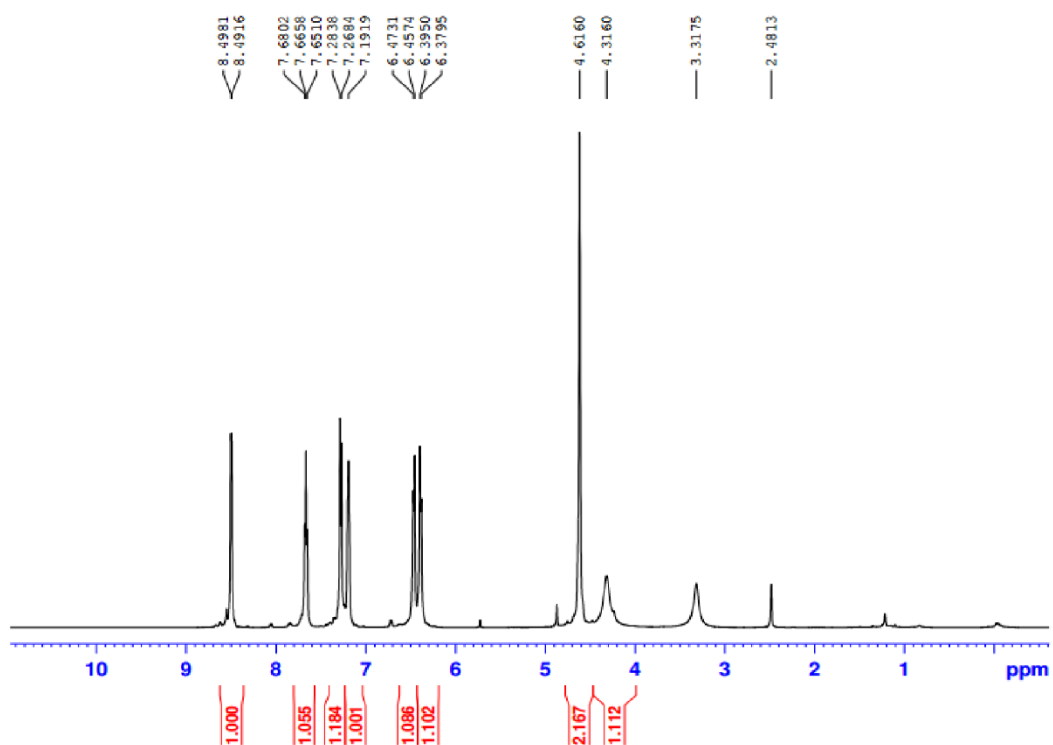

Figure S2. <sup>13</sup>C NMR of 4-amino-N, N-di-(2-pyridylmethyl)-aniline

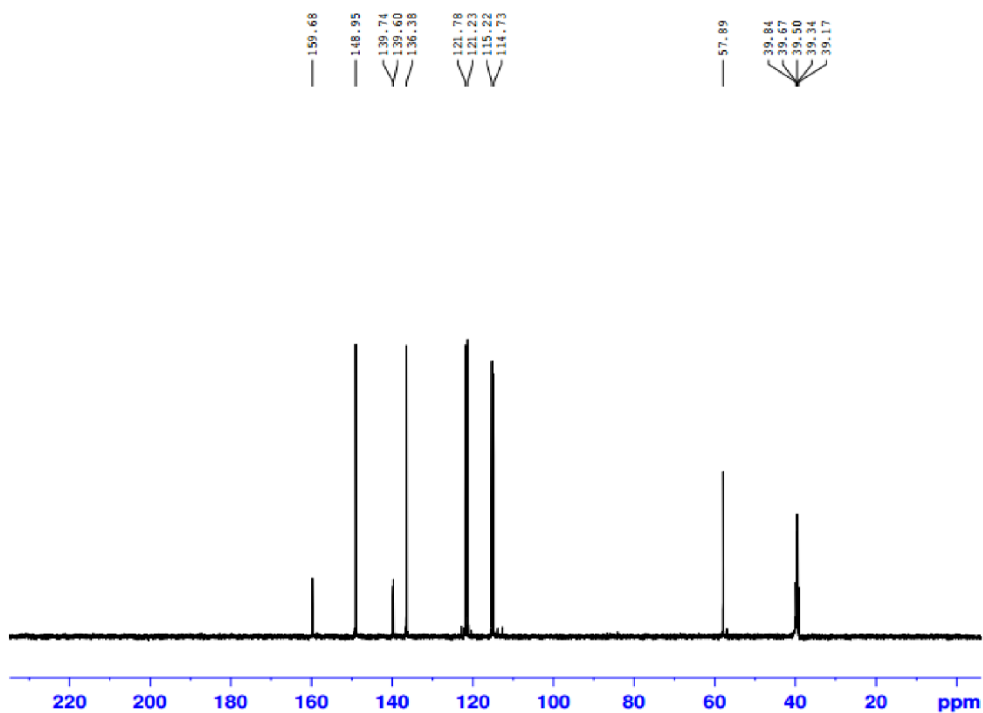

**Figure S3. MS of 4-amino-N, N-di-(2-pyridylmethyl)-aniline**

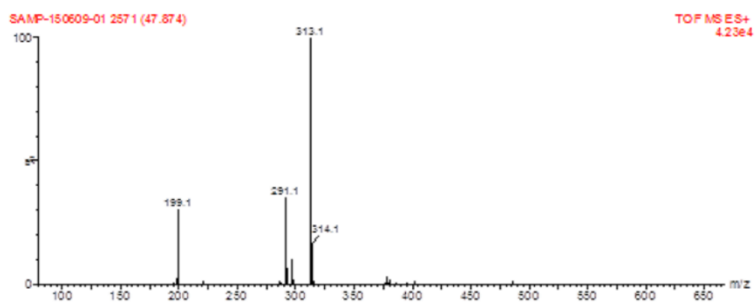

**Figure S4. FTIR of 4-amino-N, N-di-(2-pyridylmethyl)-aniline**

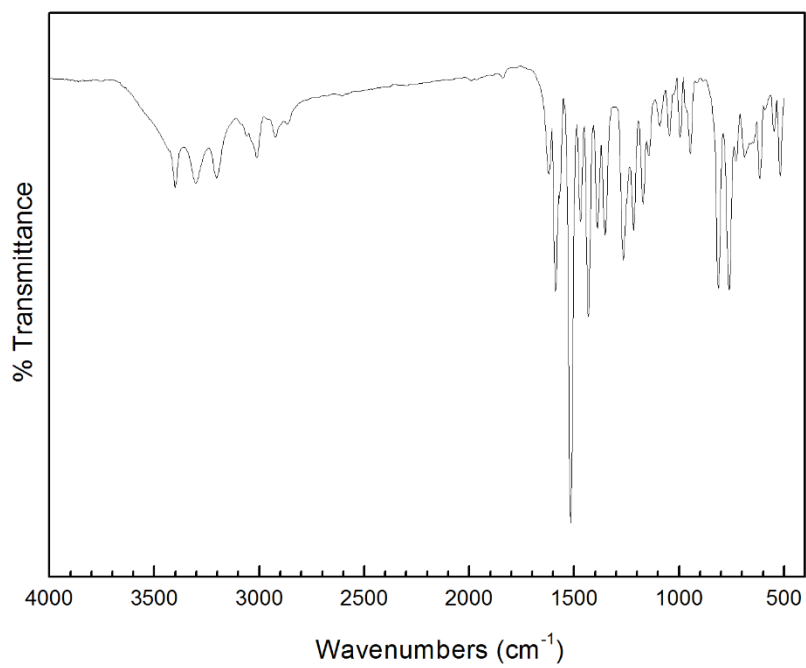

Supplement: c5ra09173j1.pdf [file c5ra09173j1.pdf]
